# Supplementary material for: A Two-stage Concept Mapping for Emerging Concepts: An Analysis of the Smart Healthy City
Source: Research Square preprint supplement (doi:10.21203/rs.3.rs-5326308/v1), 2025-08-20
Supplement: Supplementary file 1 [file 349a94ab37826f8c0297b7e5.pdf]

1    **Table 1. Comparative Analysis of Smart City, Healthy City, SHAFE, and Smart Healthy City Concepts**

| Feature                 | Smart City                                                   | Healthy City                                                    | Smart Healthy Age-Friendly Environments (SHAFE)                        | Smart Healthy City (SHC)                                                                                   |
|-------------------------|--------------------------------------------------------------|-----------------------------------------------------------------|------------------------------------------------------------------------|------------------------------------------------------------------------------------------------------------|
| Primary Focus           | Technological infrastructure and digital solutions           | Health promotion and environmental determinants of health       | Age-friendly design with smart technology integration                  | Integration of smart technologies with health-promoting strategies                                         |
| Key Objectives          | Enhance urban efficiency, sustainability through technology  | Improve population health outcomes and reduce health inequities | Support aging in place through technology and inclusive design         | Achieve health equity, smart connectivity, and system-level resilience                                     |
| Target Population       | General urban residents with emphasis on tech-savvy citizens | All urban residents with focus on vulnerable populations        | Primarily older adults and people with disabilities                    | All urban residents across the lifespan                                                                    |
| Theoretical Foundation  | Information and communication technology theories            | Social determinants of health, public health principles         | Combination of gerontology and smart environment theories              | Six integrated perspectives including socio-ecological theory, capabilities approach, and systems thinking |
| Implementation Approach | Top-down technological deployment                            | Community-based participatory approach                          | User-centered design with multi-stakeholder collaboration              | Multi-dimensional approach balancing technology, health, and social sustainability                         |
| Potential Limitations   | Risk of digital divide and technocentric bias                | Limited integration of technological innovation                 | Narrow demographic focus may limit broader application                 | Tension between technological advancement and social sustainability priorities                             |
| Primary Dimensions      | Digital infrastructure, data analytics, IoT                  | Built environment, social cohesion, health services             | Accessible environments, supportive technologies, social participation | Healthy Environment Cities, Smart Networking Cities, Socially Sustainable Cities, Health Empowering Cities |
| Key Organizations       | Technology companies, municipal IT departments               | World Health Organization, local health authorities             | European Commission, AGE Platform Europe                               | Interdisciplinary collaboration across sectors                                                             |

3 **Table 2. Summary of Key Findings Based on Research Questions**

| Research Question |                                                                                              | Analysis Method           | Key Findings                                                                                                                                                                                                                                                                                                                                                                                                                                                                                                                      | Implications                                                                                                                                                                                        |
|-------------------|----------------------------------------------------------------------------------------------|---------------------------|-----------------------------------------------------------------------------------------------------------------------------------------------------------------------------------------------------------------------------------------------------------------------------------------------------------------------------------------------------------------------------------------------------------------------------------------------------------------------------------------------------------------------------------|-----------------------------------------------------------------------------------------------------------------------------------------------------------------------------------------------------|
| 1                 | What constitutes the concept of a Smart Healthy City?                                        | Concept Mapping Analysis  | Four dimensions identified through multidimensional scaling and hierarchical cluster analysis:<br><ul style="list-style-type: none"> <li>- Healthy Environment Cities</li> <li>- Smart Networking Cities</li> <li>- Socially Sustainable Cities</li> <li>- Health Empowering Cities</li> </ul>                                                                                                                                                                                                                                    | Provides a comprehensive framework for conceptualizing and implementing SHCs that balances technological infrastructure with social determinants of health                                          |
| 2                 | What are the priority concepts within a Smart Healthy City?                                  | Pattern Matching Analysis | Differential contributions of SHC dimensions to core objectives:<br><ul style="list-style-type: none"> <li>- Healthy Environment Cities: Balanced contribution across all objectives (health equity, smart connectivity, system-level resilience)</li> <li>- Smart Networking Cities: Strong correlation with smart connectivity objectives</li> <li>- Socially Sustainable Cities: Primary association with health equity objectives</li> <li>- Health Empowering Cities: Key contribution to system-level resilience</li> </ul> | Guides strategic development and resource allocation in SHC initiatives by highlighting how different dimensions contribute to key urban health objectives                                          |
| 3                 | What are the key concepts integral to achieving the core objectives of a Smart Healthy City? | Go-Zone Analysis          | Highest-priority concepts across multiple objectives:<br><ul style="list-style-type: none"> <li>- Easy access to healthcare services (Healthy Environment Cities)</li> <li>- Efficient health promotion (Healthy Environment Cities)</li> <li>- Integration of smart technologies (Smart Networking Cities)</li> <li>- Disease prevention focus (Health Empowering Cities)</li> <li>- No statements from Socially Sustainable Cities cluster appeared in the highest-priority zone</li> </ul>                                     | Identifies actionable focal points for SHC development while revealing a potential disconnect between the theoretical importance of social sustainability and its practical implementation priority |

4

5 **Table 3. SHC Dimensions Summary and Comparison**

| SHC Dimension             | Definition                                                                                                                                                                                                                                                                                                                                                     | Thematic Focus                                                 | No. of Stmts | Mean (s.d.) | Key Statements by Importance (mean score)                              | Core SHC Objectives* (Mean (s.d.))                 | Theoretical Connections                                                                                                                                                                                                                                                                                                                                                                                |
|---------------------------|----------------------------------------------------------------------------------------------------------------------------------------------------------------------------------------------------------------------------------------------------------------------------------------------------------------------------------------------------------------|----------------------------------------------------------------|--------------|-------------|------------------------------------------------------------------------|----------------------------------------------------|--------------------------------------------------------------------------------------------------------------------------------------------------------------------------------------------------------------------------------------------------------------------------------------------------------------------------------------------------------------------------------------------------------|
| Healthy Environment City  | <ul style="list-style-type: none"> <li>Focuses on creating health-promoting physical environments with accessible infrastructure and services.</li> <li>Emphasizes urban design elements that facilitate physical activity, provide easy access to healthcare services, and promote overall wellbeing through efficient health systems integration.</li> </ul> | Physical Urban Infrastructure for Health                       | 7            | 4.05 (0.21) | Health-promoting urban environment elements (4.29)                     | HE: 3.77(0.96)<br>SR: 3.77(1.02)<br>SC: 3.71(1.05) | <b>Foundational Theory:</b> <ul style="list-style-type: none"> <li>Socio-ecological Theory: Physical environmental level of health influence</li> </ul> <b>Integrative Theories:</b> <ul style="list-style-type: none"> <li>Systems Thinking: Interconnected urban environment systems</li> <li>Smart City Theory: Integration of health-promoting technologies in urban spaces</li> </ul>             |
|                           |                                                                                                                                                                                                                                                                                                                                                                |                                                                |              |             | Easy access to healthcare services (4.21)                              |                                                    |                                                                                                                                                                                                                                                                                                                                                                                                        |
|                           |                                                                                                                                                                                                                                                                                                                                                                |                                                                |              |             | Highly efficient in improving health (4.15)                            |                                                    |                                                                                                                                                                                                                                                                                                                                                                                                        |
|                           |                                                                                                                                                                                                                                                                                                                                                                |                                                                |              |             | Encompassing smart city and healthy city concepts (4.14)               |                                                    |                                                                                                                                                                                                                                                                                                                                                                                                        |
| Smart Networking City     | <ul style="list-style-type: none"> <li>Leverages digital connectivity and information sharing to enhance healthcare delivery, facilitate inter-agency collaboration, and engage citizens.</li> <li>Focuses on breaking down technological barriers and using digital innovations to transform traditional healthcare approaches.</li> </ul>                    | Digital Connectivity for Health System Transformation          | 13           | 3.95 (0.24) | Going beyond traditional healthcare through smart technologies (4.50)  | HE: 3.50(1.13)<br>SR: 4.30(0.63)<br>SC: 3.85(0.89) | <b>Foundational Theory:</b> <ul style="list-style-type: none"> <li>Smart City Theory: Technological solutions for urban health challenges</li> </ul> <b>Integrative Theories:</b> <ul style="list-style-type: none"> <li>Participatory Urban Planning: Digital citizen engagement</li> <li>Systems Thinking: Connectivity between stakeholders and agencies</li> </ul>                                 |
|                           |                                                                                                                                                                                                                                                                                                                                                                |                                                                |              |             | Using digital technology to reorient healthcare (4.21)                 |                                                    |                                                                                                                                                                                                                                                                                                                                                                                                        |
|                           |                                                                                                                                                                                                                                                                                                                                                                |                                                                |              |             | No barriers to utilizing smart technologies (4.14)                     |                                                    |                                                                                                                                                                                                                                                                                                                                                                                                        |
|                           |                                                                                                                                                                                                                                                                                                                                                                |                                                                |              |             | Application of bio and industrial technologies felt by citizens (4.07) |                                                    |                                                                                                                                                                                                                                                                                                                                                                                                        |
| Socially Sustainable City | <ul style="list-style-type: none"> <li>Promoting social inclusivity, addressing community health needs, and ensuring quality of life for vulnerable populations.</li> <li>Emphasizes collective wellbeing, intergenerational harmony, and solutions to social challenges including aging and inequality.</li> </ul>                                            | Inclusive Community Wellbeing                                  | 17           | 3.85 (0.31) | Targeting the health of the entire community (4.50)                    | HE: 4.16(0.79)<br>SR: 3.18(1.14)<br>SC: 3.67(0.99) | <b>Foundational Theory:</b> <ul style="list-style-type: none"> <li>Health Equity &amp; Social Determinants: Focus on vulnerable populations</li> </ul> <b>Integrative Theories:</b> <ul style="list-style-type: none"> <li>Participatory Urban Planning: Inclusive policies and community-centered approaches</li> <li>Capabilities Approach: Enhancing dignity regardless of circumstances</li> </ul> |
|                           |                                                                                                                                                                                                                                                                                                                                                                |                                                                |              |             | Enhancing quality of life for people with disabilities (4.07)          |                                                    |                                                                                                                                                                                                                                                                                                                                                                                                        |
|                           |                                                                                                                                                                                                                                                                                                                                                                |                                                                |              |             | Improving quality of life for the elderly (4.07)                       |                                                    |                                                                                                                                                                                                                                                                                                                                                                                                        |
|                           |                                                                                                                                                                                                                                                                                                                                                                |                                                                |              |             | Offering solutions to aging population challenges (4.00)               |                                                    |                                                                                                                                                                                                                                                                                                                                                                                                        |
| Health Empowering City    | <ul style="list-style-type: none"> <li>Focused on building resilience and enhancing capabilities at both individual and system levels,</li> <li>Emphasizing preventive approaches, adaptive capacity development, and empowerment of citizens to take control of their</li> </ul>                                                                              | Individual and System-Level Resilience and Capability Building | 20           | 3.73 (0.34) | Model for disease prevention (4.29)                                    | HE: 3.62(0.98)<br>SR: 3.38(1.12)<br>SC: 3.68(1.05) | <b>Foundational Theory:</b> <ul style="list-style-type: none"> <li>Capabilities Approach: Development of individual and collective capabilities to achieve health and wellbeing</li> </ul> <b>Integrative Theories:</b> <ul style="list-style-type: none"> <li>Systems Thinking: Systemic resilience and adaptive capacity across multiple</li> </ul>                                                  |
|                           |                                                                                                                                                                                                                                                                                                                                                                |                                                                |              |             | Public health city safe from infectious diseases (4.29)                |                                                    |                                                                                                                                                                                                                                                                                                                                                                                                        |
|                           |                                                                                                                                                                                                                                                                                                                                                                |                                                                |              |             | Social model that scales healthy living behaviors (4.14)               |                                                    |                                                                                                                                                                                                                                                                                                                                                                                                        |

Tables

| SHC Dimension | Definition                                                                                 | Thematic Focus | No. of Stmts | Mean (s.d.) | Key Statements by Importance (mean score)             | Core SHC Objectives* (Mean (s.d.)) | Theoretical Connections                                                                                  |
|---------------|--------------------------------------------------------------------------------------------|----------------|--------------|-------------|-------------------------------------------------------|------------------------------------|----------------------------------------------------------------------------------------------------------|
|               | health trajectories through personalized services and community-based preventive measures. |                |              |             | Providing personalized and customized services (4.07) |                                    | urban scales                                                                                             |
|               |                                                                                            |                |              |             | Maintaining personal quality of life (4.07)           |                                    | • Participatory Urban Planning: Co-production of preventive health strategies and empowerment mechanisms |

6 \* HE: Health Equity; SR: System-level Resilience; SC: Smart Connectivity

7 **Table 4. Detailed Statements in Zone 8 and Importance Ratings**

| Statements(no.)                                                                                                              | Importance              |      |                                 |      |                                      |      |         |      | Cluster                     |
|------------------------------------------------------------------------------------------------------------------------------|-------------------------|------|---------------------------------|------|--------------------------------------|------|---------|------|-----------------------------|
|                                                                                                                              | Aim 1:<br>Health Equity |      | Aim 2:<br>Smart<br>Connectivity |      | Aim 3:<br>System-level<br>Resilience |      | Average |      |                             |
|                                                                                                                              | Mean                    | S.D. | Mean                            | S.D. | Mean                                 | S.D. | Mean    | S.D. |                             |
| A smart healthy city is a city with easy access to health and welfare services (10)                                          | 4.56                    | 0.73 | 3.88                            | 0.96 | 4.00                                 | 1.03 | 4.15    | 0.37 | Healthy<br>Environment City |
| A smart healthy city is a city that is highly efficient in improving the health of individuals and the city as a whole. (23) | 3.81                    | 1.05 | 4.19                            | 0.91 | 3.94                                 | 0.85 | 3.98    | 0.19 |                             |
| A smart healthy city is a city that is well equipped with basic infrastructure. (5)                                          | 3.87                    | 0.74 | 3.63                            | 1.41 | 3.88                                 | 1.09 | 3.78    | 0.14 |                             |
| A smart healthy city is a city where there are no barriers to utilizing smart technologies. (31)                             | 3.81                    | 1.22 | 4.50                            | 0.63 | 3.80                                 | 0.86 | 4.04    | 0.40 | Smart Networking<br>City    |
| A smart healthy city is an essential model for disease prevention (19)                                                       | 4.15                    | 0.56 | 3.69                            | 1.08 | 4.00                                 | 0.89 | 3.95    | 0.24 | Health<br>Empowering City   |
