# Supplementary material for: A Two-stage Concept Mapping for Emerging Concepts: An Analysis of the Smart Healthy City
Source: Research Square preprint supplement (doi:10.21203/rs.3.rs-5326308/v1), 2025-08-20
Supplement: Supplementary file 2 [file ee5a4ec54a88d658236437e3.pdf]

# 1 Supplementary Material

2 Table S1. Study Participants

| Process                      | Participation |           | No | Type of Institutions | Positions  | Specialty                        | Age (yrs) | Gender | Experience (yrs) |
|------------------------------|---------------|-----------|----|----------------------|------------|----------------------------------|-----------|--------|------------------|
|                              | Session 1     | Session 2 |    |                      |            |                                  |           |        |                  |
| Expert-Focus Group Interview | Yes           | No        | 1  | University           | Professor  | Preventive Medicine              | 58        | Male   | 33.7             |
|                              | Yes           | No        | 2  | University           | Professor  | Preventive Medicine              | 53        | Male   | 28.2             |
|                              | Yes           | No        | 3  | University           | Professor  | Urban planning                   | 46        | Male   | 18.3             |
|                              | Yes           | No        | 4  | University           | Professor  | Urban planning                   | 58        | Male   | 33.5             |
|                              | Yes           | No        | 5  | University           | Professor  | Urban Planning                   | 46        | Female | 19.2             |
|                              | Yes           | No        | 6  | University           | Professor  | Health Promotion                 | 52        | Female | 26.4             |
|                              | Yes           | No        | 7  | University           | Professor  | A Healthy City                   | 51        | Female | 19.7             |
|                              | Yes           | No        | 8  | University           | Professor  | Management Information Systems   | 43        | Female | 20.3             |
|                              | No            | Yes       | 9  | University           | Professor  | Governance                       | 55        | Male   | 19.2             |
|                              | No            | Yes       | 10 | University           | Professor  | Science and Technology Policy    | 58        | Male   | 28.0             |
|                              | No            | Yes       | 11 | University           | Professor  | Urban planning                   | 57        | Male   | 33.3             |
|                              | No            | Yes       | 12 | University           | Researcher | Urban planning                   | 35        | Male   | 8.1              |
|                              | No            | Yes       | 13 | University           | Professor  | Medical Informatics              | 46        | Female | 21.3             |
|                              | No            | Yes       | 14 | University           | Professor  | Occupational therapy             | 40        | Female | 17.4             |
|                              | Yes           | No        | 15 | Research Institute   | Researcher | Atmospheric science              | 45        | Male   | 16.2             |
|                              | Yes           | No        | 16 | Research Institute   | Researcher | Health Promotion                 | 43        | Male   | 25.1             |
|                              | Yes           | No        | 17 | Research Institute   | Researcher | Health Promotion                 | 54        | Male   | 30.3             |
|                              | Yes           | No        | 18 | Research Institute   | Researcher | Occupational Therapy             | 41        | Male   | 14.2             |
|                              | Yes           | No        | 19 | Research Institute   | Researcher | Occupational Therapy             | 37        | Male   | 10.3             |
|                              | Yes           | No        | 20 | Research Institute   | Researcher | Occupational therapy             | 50        | Female | 28.5             |
|                              | No            | Yes       | 21 | Research Institute   | Researcher | Living Lab                       | 62        | Male   | 24.0             |
|                              | No            | Yes       | 22 | Research Institute   | Researcher | Motor Learning and Control       | 46        | Male   | 21.0             |
|                              | No            | Yes       | 23 | Research Institute   | Researcher | Urban Planning                   | 42        | Female | 15.1             |
|                              | Yes           | No        | 24 | Research Institute   | Researcher | Health Promotion                 | 38        | Female | 12.2             |
|                              | Yes           | No        | 25 | Research Institute   | Researcher | Endocrinology and Digital health | 45        | Female | 20.0             |
|                              | Yes           | No        | 26 | Software Company     | CEO        | Digital Healthcare               | 54        | Male   | 31.3             |

| Process               | Participation |           | No   | Type of Institutions     | Positions      | Specialty                        | Age (yrs)         | Gender            | Experience (yrs) |
|-----------------------|---------------|-----------|------|--------------------------|----------------|----------------------------------|-------------------|-------------------|------------------|
|                       | Session 1     | Session 2 |      |                          |                |                                  |                   |                   |                  |
| Process               | Yes           | No        | 27   | Software Company         | CEO            | Digital Healthcare               | 41                | Male              | 13.5             |
|                       | Yes           | No        | 28   | Design Company           | CEO            | Urban Planning                   | 44                | Male              | 19.6             |
|                       | Yes           | No        | 29   | Design Company           | CEO            | Urban Planning                   | 52                | Male              | 26.8             |
|                       | No            | Yes       | 30   | Municipal Office         | Public Officer | Internet of Things               | 59                | Male              | 22.7             |
|                       | No            | Yes       | 31   | Research Institute       | Researcher     | Living Lab                       | 51                | Female            | 27.4             |
|                       | No            | Yes       | 32   | Patient Support Group    | Advisor        | Living Lab                       | 46                | Female            | 21.3             |
|                       | No            | Yes       | 33   | Public Institution       | Public Officer | Preventive Medicine              | 62                | Female            | 37.5             |
|                       | No            | Yes       | 34   | Public Institution       | Public Officer | Health Promotion                 | 54                | Female            | 27.6             |
|                       | No            | Yes       | 35   | Public Institution       | Public Officer | Health Promotion                 | 55                | Female            | 31.1             |
|                       |               |           | Mean |                          |                |                                  | 49.11             | 0.57 <sup>1</sup> | 22.92            |
|                       |               |           | S.D. |                          |                |                                  | 7.33              | 0.50 <sup>1</sup> | 7.26             |
| Group Concept Mapping | Yes           | Yes       | 1    | University               | Professor      | Preventive dentistry             | 42                | Male              | 6.6              |
|                       | Yes           | Yes       | 2    | University               | Professor      | Health promotion                 | 59                | Male              | 25.3             |
|                       | Yes           | Yes       | 3    | University               | Professor      | Urban planning                   | 47                | Male              | 7.3              |
|                       | Yes           | Yes       | 4    | University               | Professor      | Urban planning                   | 58                | Male              | 7.1              |
|                       | Yes           | Yes       | 5    | University               | Professor      | Architecture and urban planning  | 36                | Male              | 0.8              |
|                       | Yes           | Yes       | 6    | University               | Professor      | Politics                         | 56                | Male              | 6.0              |
|                       | Yes           | Yes       | 7    | University               | Professor      | Occupational therapy             | 53                | Male              | 10.8             |
|                       | Yes           | Yes       | 8    | University               | Professor      | Urban planning                   | 47                | Female            | 5.3              |
|                       | Yes           | Yes       | 9    | University               | Professor      | Urban planning                   | 47                | Female            | 8.3              |
|                       | Yes           | Yes       | 10   | University               | Professor      | Health policy and administration | 52                | Female            | 12.8             |
|                       | Yes           | Yes       | 11   | Education Center         | Director       | Social welfare                   | 44                | Male              | 5.4              |
|                       | Yes           | Yes       | 12   | Research Institute       | Director       | Geography Education              | 47                | Male              | 5.7              |
|                       | Yes           | Yes       | 13   | Meteorological Institute | Director       | Atmospheric science              | 46                | Male              | 13.3             |
|                       | Yes           | Yes       | 14   | Research Institute       | Researcher     | Urban planning and design        | 43                | Female            | 5.5              |
|                       | Yes           | No        | 15   | Research Institute       | Researcher     | Public administration            | 63                | Male              | 25.0             |
|                       | Yes           | No        | 16   | University               | Professor      | Mechanical engineering           | 44                | Male              | 4.7              |
|                       |               |           | Mean |                          |                |                                  | 49.00             | 0.71 <sup>1</sup> | 9.00             |
|                       |               | S.D.      |      |                          |                | 7.21                             | 0.47 <sup>1</sup> | 6.89              |                  |

3 1 Proportion of male participants calculated as the number of male participants divided by the total number of participants.

4 Table S2. Clusters and Statements Defining the Concept of a Smart Healthy City

| Cluster (Number of Stmts)               | Statements |                                                                                                                         |      |      |
|-----------------------------------------|------------|-------------------------------------------------------------------------------------------------------------------------|------|------|
|                                         | No.        | Content                                                                                                                 | Mean | S.D  |
| <b>Healthy Environment Cities (7)</b>   | 3          | A smart healthy city is a city that encompasses the concepts of a smart city and a healthy city.                        | 4.14 | 0.86 |
|                                         | 5          | A smart healthy city is a city that is well equipped with basic infrastructure.                                         | 3.86 | 0.77 |
|                                         | 10         | A smart healthy city is a city with easy access to healthcare.                                                          | 4.21 | 0.58 |
|                                         | 23         | A smart healthy city is a city that is highly efficient in improving the health of individuals and the city as a whole. | 4.15 | 0.90 |
|                                         | 42         | A smart healthy city is a city that aims to promote physical activity using smart mobility.                             | 4.00 | 0.88 |
|                                         | 53         | A smart healthy city is a city that improves human psychology.                                                          | 3.71 | 0.91 |
|                                         | 55         | A smart healthy city is a city with urban environment elements for health.                                              | 4.29 | 0.83 |
| <b>Smart Networking Cities (13)</b>     | 20         | A smart healthy city is a city where data is shared between organizations.                                              | 3.79 | 1.05 |
|                                         | 21         | A smart healthy city is a city that enables inter-agency communication.                                                 | 3.93 | 0.83 |
|                                         | 22         | A smart healthy city is a city where inter-agency data can be used collaboratively.                                     | 3.93 | 0.92 |
|                                         | 25         | A smart healthy city is a city that enables residents to communicate with each other.                                   | 3.86 | 0.95 |
|                                         | 31         | A smart healthy city is a city where there are no barriers to utilizing smart technologies.                             | 4.14 | 0.86 |
|                                         | 32         | A smart health city is a city that uses digital technology to reorient healthcare.                                      | 4.21 | 1.12 |
|                                         | 33         | A smart health city is a city where the application of bio and industrial technologies is felt by its citizens.         | 4.07 | 0.92 |
|                                         | 35         | A smart health city is a city that smartens the needs of its citizens.                                                  | 3.93 | 1.07 |
|                                         | 43         | A smart health city is a city that engages its citizens in community activities through digital connectivity.           | 3.79 | 1.05 |
|                                         | 44         | A smart health city is a city that engages citizens in services through digital connectivity.                           | 3.79 | 0.89 |
|                                         | 46         | A smart healthy city is a city that promotes opportunities for participation through networking.                        | 3.79 | 0.89 |
|                                         | 47         | A smart healthy city is a city with a circular structure where networking enhances capabilities.                        | 3.86 | 0.95 |
|                                         | 56         | Smart health cities are cities that go beyond the traditional healthcare system through smart technologies.             | 4.50 | 1.09 |
| <b>Socially Sustainable Cities (17)</b> | 4          | A smart healthy city is a city that supports the lives of its citizens and communities in a social environment.         | 3.71 | 0.91 |
|                                         | 6          | A Smart Healthy City is socially sustainable.                                                                           | 3.86 | 0.77 |
|                                         | 7          | A smart healthy city is financially sustainable.                                                                        | 3.86 | 1.03 |
|                                         | 8          | A smart healthy city is a city that promotes inclusive policies.                                                        | 4.00 | 0.55 |
|                                         | 13         | A smart healthy city is a city that adapts unhealthy parts of the city to the needs of its citizens.                    | 3.07 | 0.92 |
|                                         | 16         | A smart healthy city is a city that sets standards for marginalized groups.                                             | 3.86 | 0.53 |
|                                         | 17         | A smart healthy city is a city where the spatial environment is built for the socially vulnerable.                      | 4.00 | 0.55 |
|                                         | 27         | A smart healthy city is a city that allows universal dignity to be maintained.                                          | 3.79 | 0.70 |
|                                         | 34         | A smart healthy city is a city that targets the health of the entire community.                                         | 4.50 | 0.65 |
|                                         | 39         | A smart healthy city is a city that offers solutions to the problem of an aging population.                             | 4.00 | 0.68 |
|                                         | 40         | A smart healthy city is a city that offers solutions to address issues of inequality                                    | 3.93 | 0.83 |

| Cluster (Number of Stmts)            | Statements                                                           |                                                                                                                  |      |      |
|--------------------------------------|----------------------------------------------------------------------|------------------------------------------------------------------------------------------------------------------|------|------|
|                                      | No.                                                                  | Content                                                                                                          | Mean | S.D  |
|                                      | 48                                                                   | A smart healthy city is a city that focuses on problem-solving methods.                                          | 3.64 | 0.84 |
|                                      | 49                                                                   | A smart healthy city is a city that sets incremental goals to achieve and ideal system                           | 3.43 | 0.85 |
|                                      | 50                                                                   | A smart healthy city is a city that can address social challenges.                                               | 3.64 | 1.01 |
|                                      | 51                                                                   | A smart healthy city is a city that can enhance the quality of life for people with disabilities.                | 4.07 | 0.73 |
|                                      | 52                                                                   | A smart healthy city is a city that can improve the quality of life for the elderly.                             | 4.07 | 0.73 |
|                                      | 57                                                                   | A smart healthy city is a city where people all generations can live together harmoniously in their daily lives. | 4.00 | 0.88 |
| <b>Health Empowering Cities (20)</b> | 1                                                                    | In a smart health city, health is defined as the restoration of capabilities.                                    | 3.71 | 0.83 |
|                                      | 2                                                                    | A smart healthy city is a city that provides personalized and customized services.                               | 4.07 | 1.07 |
|                                      | 9                                                                    | A smart healthy city is a city with a clear definition of health.                                                | 3.43 | 1.09 |
|                                      | 11                                                                   | A smart healthy city is a city where the psychology of health is embedded in everyday life.                      | 3.57 | 0.85 |
|                                      | 12                                                                   | A smart healthy city is a city where healthy behaviors are part of everyday life.                                | 3.50 | 1.02 |
|                                      | 14                                                                   | A smart healthy city is a city that enlightens the thinking system of citizens through education.                | 3.00 | 0.55 |
|                                      | 15                                                                   | A smart healthy city is a city that promotes basic health.                                                       | 3.79 | 0.80 |
|                                      | 18                                                                   | A smart healthy city is a social model that scales healthy living behaviors.                                     | 4.14 | 0.86 |
|                                      | 19                                                                   | A smart healthy city is a model for disease prevention.                                                          | 4.29 | 0.73 |
|                                      | 24                                                                   | A smart healthy city is a city that values mental health.                                                        | 3.79 | 0.97 |
|                                      | 26                                                                   | A smart healthy city is a city where personal quality of life is maintained.                                     | 4.07 | 0.73 |
|                                      | 28                                                                   | A smart healthy city is a city that enables people to form healthy habits in their daily lives.                  | 3.93 | 0.83 |
|                                      | 29                                                                   | A smart healthy city is a city that promotes everyday convenience.                                               | 3.79 | 0.80 |
|                                      | 30                                                                   | A smart healthy city is a city without health literacy challenges.                                               | 3.64 | 0.93 |
|                                      | 36                                                                   | A smart healthy city is a public health city that is safe from infectious diseases.                              | 4.29 | 0.73 |
|                                      | 37                                                                   | A smart healthy city is a city that provides solutions to the carbon problem.                                    | 3.29 | 0.91 |
|                                      | 38                                                                   | A smart healthy city is a city that provides solutions to energy problems.                                       | 3.43 | 0.85 |
|                                      | 41                                                                   | A smart healthy city is a city that promotes human security in everyday life.                                    | 3.43 | 0.94 |
| 45                                   | A smart healthy city is a city that aims to strengthen capabilities. | 3.64                                                                                                             | 0.84 |      |
| 54                                   | A smart healthy city is a city that improves people's behavior       | 3.79                                                                                                             | 0.80 |      |

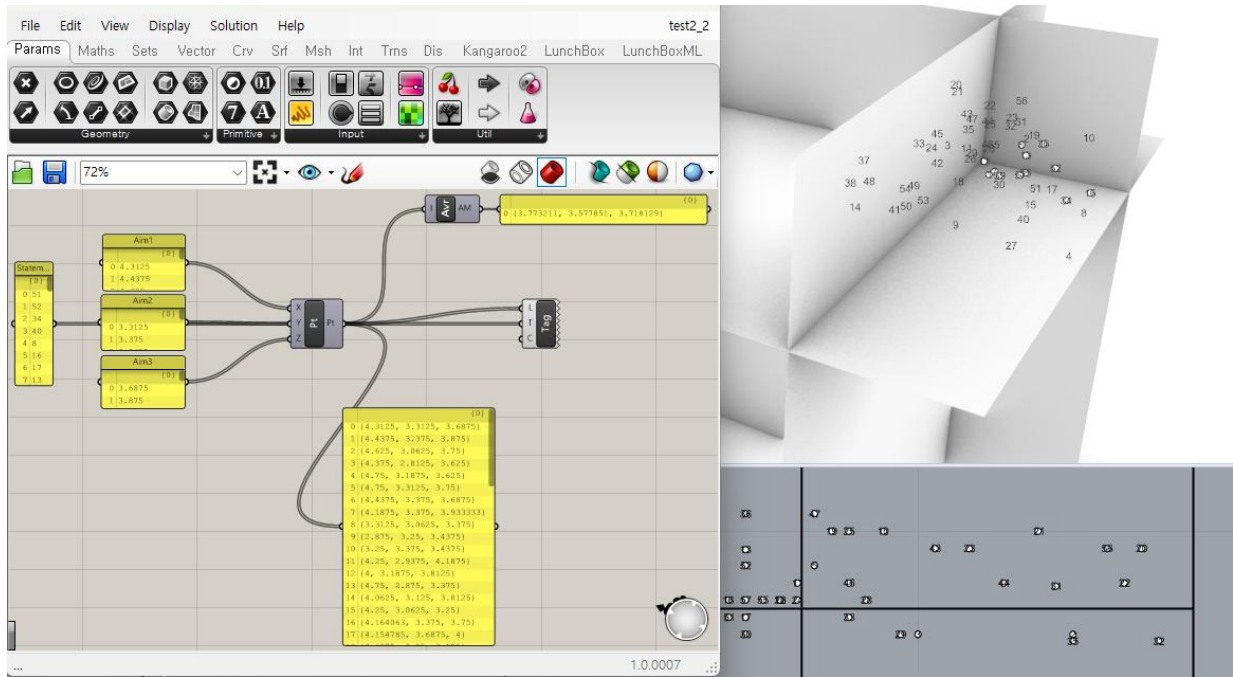

Figure S1. Results Verified Using Rhino7-Grasshopper 1.0.0007 (bottom)
